# Supplementary material for: Synthesis and proton conducting ability of a crystalline 3-D vanadoborate with [V6B20] architectures
Source: Royal Society of Chemistry journal article supplement (doi:10.1039/d2nj05801d), 2023-01-01
Supplement: d2nj05801d1.pdf [file d2nj05801d1.pdf]

## Supplementary Information

### Synthesis and Proton Conduction of a Crystalline 3-D Vanadoborate with [V<sub>6</sub>B<sub>20</sub>] Architectures

Xinxin Liu, Xianyu Wang, Biao Guo\*, Sisi Zhao, Lijing Zhou, Lian Kong and Zhen  
Zhao\*

Institute of Catalysis for Energy and Environment, College of Chemistry and  
Chemical Engineering, Shenyang Normal University, Shenyang 110034, China.  
Address correspondence to E-mail: biaoguo14@126.com; zhenzhao@cup.edu.cn

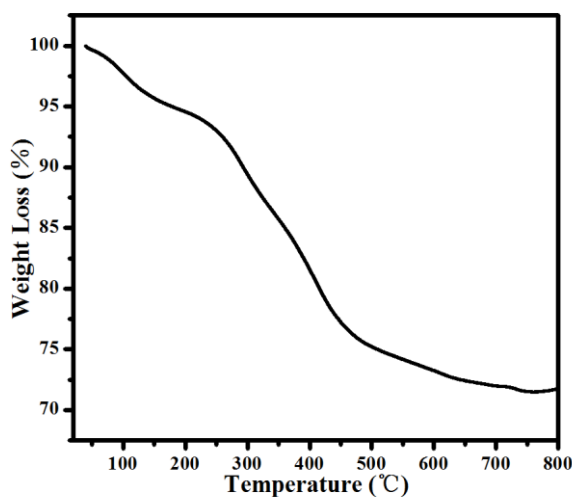

Fig. S1 TG curve of **1** in air

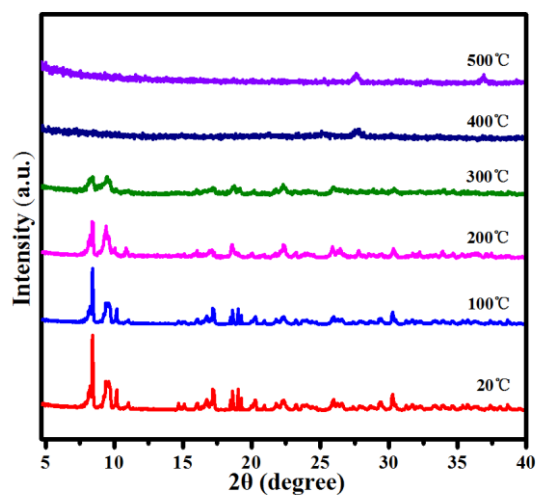

**Fig. S2** Variable temperature PXRD patterns collected in air from 20 °C to 500 °C

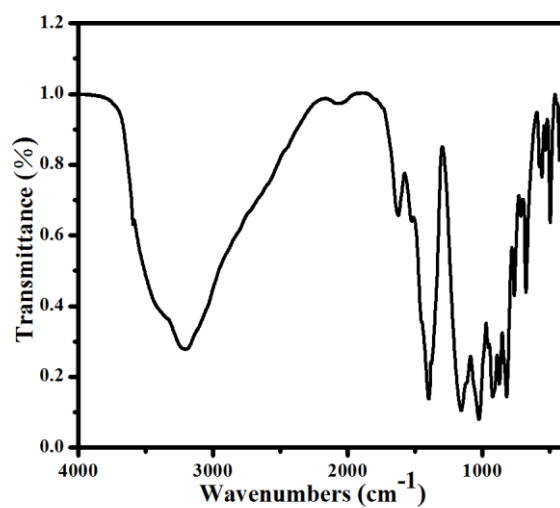

**Fig. S3** The FT-IR spectrum of **1**

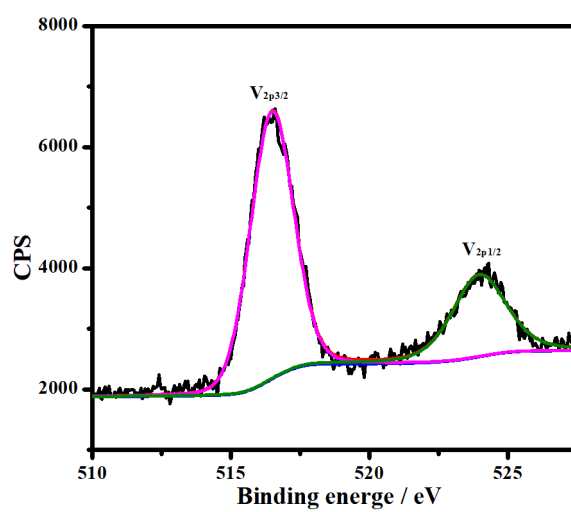

**Fig. S4** The V2p XPS spectrum of **1**

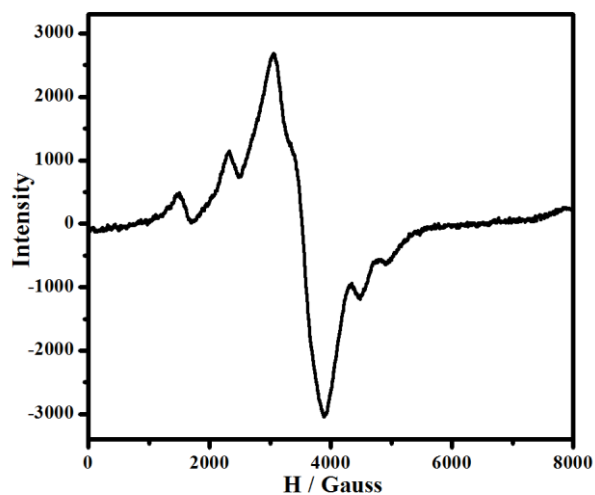

Fig. S5 EPR spectrum for compound 1

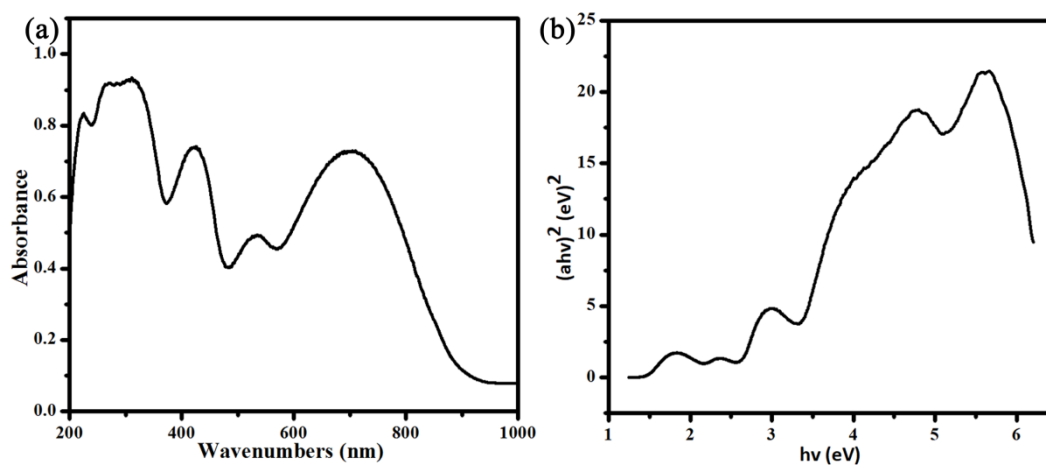

Fig. S6. UV-Vis diffuse reflectance spectrum of 1

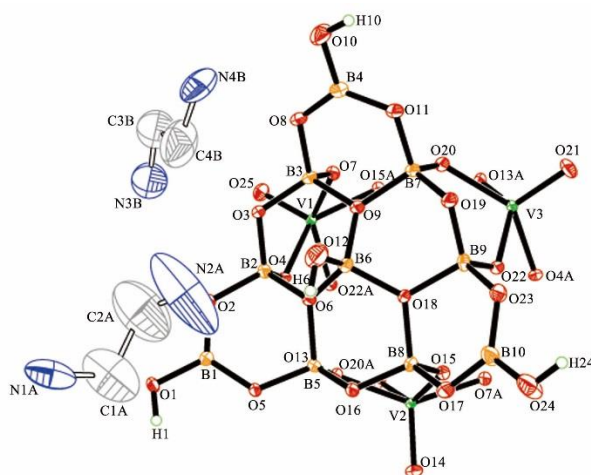

Fig. S7 The thermal ellipsoid plots (50% probability) and atomic labeling schemes of 1

### Comparison of three $[V_6B_{20}]$ -containing compounds:

The vanadoborates in refs. 36 and 37 as well as in our work are all based on the  $[V_6B_{20}]$  clusters, but they differ greatly. For our compound  $(H_2en)_4[(VO)_6(B_{10}O_{22}H_4)_2(H_2O)] \cdot 4H_2O$  (**1**),  $H_2en^{2+}$  cations and  $H_2O$  molecules are accommodated in the interclusters' space of the framework and interact with the  $[V_6B_{20}]$  polyanions via hydrogen bonds ( $N-H \cdots O$ ,  $O-H \cdots O$ ), through which the respective molecular species are integrated into 3-D architectures. For  $\{V_6B_{20}O_{44}(OH)_8(H_2O)[K(H_2O)]_2\} \cdot 2(H_3dien) \cdot 6H_2O$  (**2**) reported in ref. 36, it is built up from  $[V_6B_{20}]$  clusters and dimeric  $[K_2O_{16}]$  units, which are interconnected to give a 3-D  $\{B_{20}V_6O_{44}(OH)_8(H_2O)[K(H_2O)]_2\}_n$  architecture with 1-D tunnels filled with protonated  $H_3dien^{3+}$  ions. And for  $(H_2NCH_2CH_2NH_3)_3\{(VO)_6[B_{10}O_{16}(OH)_6]_2\} \cdot 11H_2O$  (**3**) reported in ref. 37, its crystal structure is built up from the  $[V_6B_{20}]$  anions,  $enH^+$  cations and  $H_2O$  molecules. Hydrogen bonds align the respective molecular species into a 3-D architecture. Compound **1** and compound **3** are similar in composition, but have obvious differences in structural aesthetics. In contradistinction to **3**, the obvious characteristic of **1** is that its  $[V_6B_{20}]$  cluster possesses a determined water molecule in the internal center. And the interclusters' space of **1** is filled with more ethylenediamine cations. Such different structural features may bring about great differences in their physic-chemical properties such as catalysis, magnetism, absorption, proton conduction and so on.

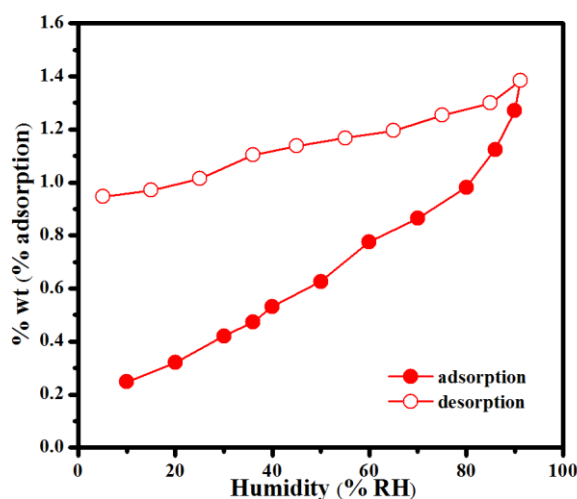

Fig. S8 Water adsorption (filled circles) and desorption (open circles) isotherms of **1** at 293 K

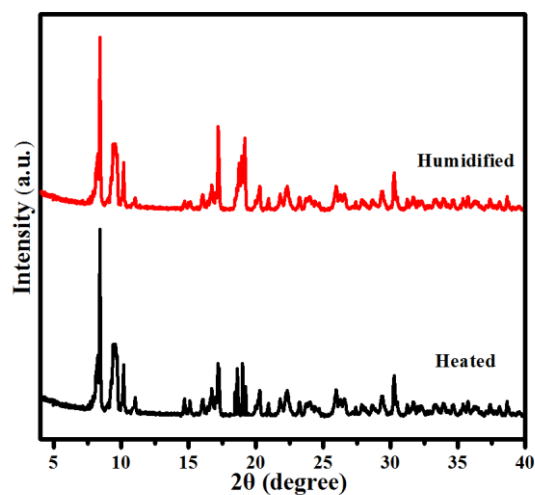

**Fig. S9** XRD patterns of compound **1** treated after impedance measurement at 333 K (Heated) and at 98% RH (Humidified)

**Table S1** Bond lengths [ $\text{\AA}$ ] for **1**

|              |           |
|--------------|-----------|
| V(1)-O(25)   | 1.612(3)  |
| V(1)-O(22)#1 | 1.947(3)  |
| V(1)-O(4)    | 1.949(3)  |
| V(1)-O(15)#1 | 1.959(3)  |
| V(1)-O(7)    | 1.977(3)  |
| V(1)-V(2)#1  | 3.0378(9) |
| V(1)-V(3)#1  | 3.0560(9) |
| V(2)-O(14)   | 1.615(3)  |
| V(2)-O(15)   | 1.932(3)  |
| V(2)-O(13)   | 1.949(3)  |
| V(2)-O(7)#1  | 1.967(3)  |
| V(2)-O(20)#1 | 1.976(3)  |
| V(2)-V(3)#1  | 3.0592(9) |
| V(3)-O(21)   | 1.615(3)  |
| V(3)-O(22)   | 1.947(3)  |
| V(3)-O(13)#1 | 1.951(3)  |
| V(3)-O(4)#1  | 1.969(3)  |
| V(3)-O(20)   | 1.979(3)  |
| O(1)-B(1)    | 1.366(5)  |
| O(1)-H(1)    | 0.8400    |
| O(2)-B(1)    | 1.370(5)  |
| O(2)-B(2)    | 1.470(5)  |
| O(3)-B(3)    | 1.429(5)  |
| O(3)-B(2)    | 1.432(5)  |
| O(4)-B(2)    | 1.467(5)  |

---

|              |           |
|--------------|-----------|
| O(5)-B(1)    | 1.367(5)  |
| O(5)-B(5)    | 1.462(5)  |
| O(6)-B(6)    | 1.489(5)  |
| O(6)-B(2)    | 1.522(5)  |
| O(6)-B(5)    | 1.532(5)  |
| O(7)-B(3)    | 1.474(5)  |
| O(8)-B(4)    | 1.361(6)  |
| O(8)-B(3)    | 1.470(5)  |
| O(9)-B(6)    | 1.490(5)  |
| O(9)-B(3)    | 1.529(5)  |
| O(9)-B(7)    | 1.534(5)  |
| O(10)-B(4)   | 1.381(6)  |
| O(10)-H(10)  | 0.8400    |
| O(11)-B(4)   | 1.359(6)  |
| O(11)-B(7)   | 1.461(5)  |
| O(12)-B(6)   | 1.439(6)  |
| O(12)-H(12)  | 0.8400    |
| O(13)-B(5)   | 1.466(6)  |
| O(15)-B(8)   | 1.466(5)  |
| O(16)-B(5)   | 1.425(5)  |
| O(16)-B(8)   | 1.427(5)  |
| O(17)-B(10)  | 1.356(6)  |
| O(17)-B(8)   | 1.461(5)  |
| O(18)-B(6)   | 1.479(5)  |
| O(18)-B(9)   | 1.526(5)  |
| O(18)-B(8)   | 1.526(5)  |
| O(19)-B(7)   | 1.428(5)  |
| O(19)-B(9)   | 1.435(5)  |
| O(20)-B(7)   | 1.472(6)  |
| O(22)-B(9)   | 1.459(5)  |
| O(23)-B(10)  | 1.376(6)  |
| O(23)-B(9)   | 1.474(5)  |
| O(24)-B(10)  | 1.374(6)  |
| O(24)-H(24)  | 0.8400    |
| N(1A)-C(1B)  | 1.46(2)   |
| N(1A)-C(1A)  | 1.537(18) |
| N(1A)-H(1AA) | 0.9100    |
| N(1A)-H(1AB) | 0.9100    |
| N(1A)-H(1AC) | 0.9100    |
| N(2A)-N(2B)  | 1.25(4)   |
| N(2A)-C(2A)  | 1.505(19) |
| C(1A)-C(2B)  | 0.71(2)   |
| C(1A)-C(1B)  | 1.23(3)   |
| C(1A)-C(2A)  | 1.487(18) |

---

---

|              |           |
|--------------|-----------|
| C(1A)-N(2B)  | 1.82(3)   |
| C(1A)-N(1B)  | 1.89(3)   |
| C(1A)-H(1AD) | 0.9900    |
| C(1A)-H(1AE) | 0.9900    |
| C(2A)-C(2B)  | 1.11(3)   |
| C(2A)-C(1B)  | 1.39(3)   |
| C(2A)-N(2B)  | 1.66(3)   |
| C(2A)-H(2AA) | 0.9900    |
| C(2A)-H(2AB) | 0.9900    |
| N(1B)-C(1B)  | 1.533(15) |
| N(1B)-H(1BA) | 0.9100    |
| N(1B)-H(1BB) | 0.9100    |
| N(1B)-H(1BC) | 0.9100    |
| N(2B)-C(2B)  | 1.474(15) |
| C(1B)-C(2B)  | 1.559(15) |
| C(1B)-H(1BD) | 0.9900    |
| C(1B)-H(1BE) | 0.9900    |
| C(2B)-H(2BA) | 0.9900    |
| C(2B)-H(2BB) | 0.9900    |
| N(3A)-C(3B)  | 1.213(19) |
| N(3A)-C(3A)  | 1.40(3)   |
| N(3A)-H(3AA) | 0.9100    |
| N(3A)-H(3AB) | 0.9100    |
| N(3A)-H(3AC) | 0.9100    |
| N(4A)-C(4A)  | 1.16(4)   |
| N(4A)-C(4B)  | 1.91(3)   |
| C(3A)-C(3B)  | 1.03(3)   |
| C(3A)-C(4B)  | 1.09(3)   |
| C(3A)-C(4A)  | 1.593(19) |
| C(3A)-N(3B)  | 1.75(3)   |
| C(3A)-H(3AD) | 0.9900    |
| C(3A)-H(3AE) | 0.9900    |
| C(4A)-C(4B)  | 0.77(3)   |
| C(4A)-N(4B)  | 1.82(4)   |
| C(4A)-H(4AA) | 0.9900    |
| C(4A)-H(4AB) | 0.9900    |
| N(3B)-C(3B)  | 1.439(16) |
| N(3B)-H(3BA) | 0.9100    |
| N(3B)-H(3BB) | 0.9100    |
| N(3B)-H(3BC) | 0.9100    |
| N(4B)-C(4B)  | 1.428(16) |
| C(3B)-C(4B)  | 1.556(16) |
| C(3B)-H(3BD) | 0.9900    |
| C(3B)-H(3BE) | 0.9900    |

---

---

|              |        |
|--------------|--------|
| C(4B)-H(4BA) | 0.9900 |
| C(4B)-H(4BB) | 0.9900 |

---

**Table S2** Bond angles [°] for **1**

---

|                      |            |
|----------------------|------------|
| O(25)-V(1)-O(22)#1   | 110.50(14) |
| O(25)-V(1)-O(4)      | 108.44(14) |
| O(22)#1-V(1)-O(4)    | 76.98(12)  |
| O(25)-V(1)-O(15)#1   | 111.43(14) |
| O(22)#1-V(1)-O(15)#1 | 88.85(12)  |
| O(4)-V(1)-O(15)#1    | 140.12(12) |
| O(25)-V(1)-O(7)      | 107.67(14) |
| O(22)#1-V(1)-O(7)    | 141.83(11) |
| O(4)-V(1)-O(7)       | 91.21(12)  |
| O(15)#1-V(1)-O(7)    | 77.20(12)  |
| O(25)-V(1)-V(2)#1    | 120.84(11) |
| O(22)#1-V(1)-V(2)#1  | 115.18(8)  |
| O(4)-V(1)-V(2)#1     | 116.67(9)  |
| O(15)#1-V(1)-V(2)#1  | 38.35(8)   |
| O(7)-V(1)-V(2)#1     | 39.51(8)   |
| O(25)-V(1)-V(3)#1    | 118.81(11) |
| O(22)#1-V(1)-V(3)#1  | 38.30(8)   |
| O(4)-V(1)-V(3)#1     | 38.96(8)   |
| O(15)#1-V(1)-V(3)#1  | 115.76(8)  |
| O(7)-V(1)-V(3)#1     | 118.73(8)  |
| V(2)#1-V(1)-V(3)#1   | 120.34(3)  |
| O(14)-V(2)-O(15)     | 106.79(14) |
| O(14)-V(2)-O(13)     | 110.66(14) |
| O(15)-V(2)-O(13)     | 90.00(12)  |
| O(14)-V(2)-O(7)#1    | 106.12(13) |
| O(15)-V(2)-O(7)#1    | 78.09(12)  |
| O(13)-V(2)-O(7)#1    | 143.19(12) |
| O(14)-V(2)-O(20)#1   | 110.26(14) |
| O(15)-V(2)-O(20)#1   | 142.96(12) |
| O(13)-V(2)-O(20)#1   | 77.01(12)  |
| O(7)#1-V(2)-O(20)#1  | 91.73(12)  |
| O(14)-V(2)-V(1)#1    | 116.96(11) |
| O(15)-V(2)-V(1)#1    | 39.00(8)   |
| O(13)-V(2)-V(1)#1    | 116.94(9)  |
| O(7)#1-V(2)-V(1)#1   | 39.76(8)   |
| O(20)#1-V(2)-V(1)#1  | 118.55(8)  |
| O(14)-V(2)-V(3)#1    | 122.32(11) |
| O(15)-V(2)-V(3)#1    | 116.36(8)  |
| O(13)-V(2)-V(3)#1    | 38.37(9)   |
| O(7)#1-V(2)-V(3)#1   | 118.37(8)  |

---



---

|                     |            |
|---------------------|------------|
| O(20)#1-V(2)-V(3)#1 | 39.37(8)   |
| V(1)#1-V(2)-V(3)#1  | 120.71(3)  |
| O(21)-V(3)-O(22)    | 111.23(14) |
| O(21)-V(3)-O(13)#1  | 110.68(14) |
| O(22)-V(3)-O(13)#1  | 138.09(12) |
| O(21)-V(3)-O(4)#1   | 109.56(14) |
| O(22)-V(3)-O(4)#1   | 76.52(11)  |
| O(13)#1-V(3)-O(4)#1 | 89.19(12)  |
| O(21)-V(3)-O(20)    | 108.50(14) |
| O(22)-V(3)-O(20)    | 90.43(12)  |
| O(13)#1-V(3)-O(20)  | 76.90(12)  |
| O(4)#1-V(3)-O(20)   | 141.94(11) |
| O(21)-V(3)-V(1)#1   | 119.92(11) |
| O(22)-V(3)-V(1)#1   | 38.30(8)   |
| O(13)#1-V(3)-V(1)#1 | 115.16(9)  |
| O(4)#1-V(3)-V(1)#1  | 38.49(8)   |
| O(20)-V(3)-V(1)#1   | 117.87(8)  |
| O(21)-V(3)-V(2)#1   | 121.13(11) |
| O(22)-V(3)-V(2)#1   | 114.68(8)  |
| O(13)#1-V(3)-V(2)#1 | 38.32(8)   |
| O(4)#1-V(3)-V(2)#1  | 115.26(8)  |
| O(20)-V(3)-V(2)#1   | 39.31(8)   |
| V(1)#1-V(3)-V(2)#1  | 118.95(3)  |
| B(1)-O(1)-H(1)      | 109.5      |
| B(1)-O(2)-B(2)      | 121.3(3)   |
| B(3)-O(3)-B(2)      | 117.2(3)   |
| B(2)-O(4)-V(1)      | 125.1(2)   |
| B(2)-O(4)-V(3)#1    | 129.0(2)   |
| V(1)-O(4)-V(3)#1    | 102.54(13) |
| B(1)-O(5)-B(5)      | 123.2(3)   |
| B(6)-O(6)-B(2)      | 122.2(3)   |
| B(6)-O(6)-B(5)      | 122.5(3)   |
| B(2)-O(6)-B(5)      | 115.3(3)   |
| B(3)-O(7)-V(2)#1    | 128.2(2)   |
| B(3)-O(7)-V(1)      | 124.6(2)   |
| V(2)#1-O(7)-V(1)    | 100.73(13) |
| B(4)-O(8)-B(3)      | 121.7(3)   |
| B(6)-O(9)-B(3)      | 121.3(3)   |
| B(6)-O(9)-B(7)      | 121.2(3)   |
| B(3)-O(9)-B(7)      | 116.4(3)   |
| B(4)-O(10)-H(10)    | 109.5      |
| B(4)-O(11)-B(7)     | 121.5(3)   |
| B(6)-O(12)-H(12)    | 109.5      |
| B(5)-O(13)-V(2)     | 124.9(2)   |

---

---

|                   |            |
|-------------------|------------|
| B(5)-O(13)-V(3)#1 | 128.8(2)   |
| V(2)-O(13)-V(3)#1 | 103.31(13) |
| B(8)-O(15)-V(2)   | 125.2(2)   |
| B(8)-O(15)-V(1)#1 | 129.7(2)   |
| V(2)-O(15)-V(1)#1 | 102.65(13) |
| B(5)-O(16)-B(8)   | 116.2(3)   |
| B(10)-O(17)-B(8)  | 120.9(3)   |
| B(6)-O(18)-B(9)   | 122.2(3)   |
| B(6)-O(18)-B(8)   | 122.9(3)   |
| B(9)-O(18)-B(8)   | 114.9(3)   |
| B(7)-O(19)-B(9)   | 117.4(3)   |
| B(7)-O(20)-V(2)#1 | 128.6(2)   |
| B(7)-O(20)-V(3)   | 123.5(2)   |
| V(2)#1-O(20)-V(3) | 101.32(13) |
| B(9)-O(22)-V(3)   | 126.6(2)   |
| B(9)-O(22)-V(1)#1 | 127.9(2)   |
| V(3)-O(22)-V(1)#1 | 103.39(13) |
| B(10)-O(23)-B(9)  | 122.5(3)   |
| B(10)-O(24)-H(24) | 109.5      |
| O(1)-B(1)-O(5)    | 119.3(4)   |
| O(1)-B(1)-O(2)    | 118.3(4)   |
| O(5)-B(1)-O(2)    | 122.5(4)   |
| O(3)-B(2)-O(4)    | 112.9(3)   |
| O(3)-B(2)-O(2)    | 110.1(3)   |
| O(4)-B(2)-O(2)    | 109.0(3)   |
| O(3)-B(2)-O(6)    | 108.4(3)   |
| O(4)-B(2)-O(6)    | 107.8(3)   |
| O(2)-B(2)-O(6)    | 108.5(3)   |
| O(3)-B(3)-O(8)    | 110.6(3)   |
| O(3)-B(3)-O(7)    | 111.8(3)   |
| O(8)-B(3)-O(7)    | 110.1(3)   |
| O(3)-B(3)-O(9)    | 109.2(3)   |
| O(8)-B(3)-O(9)    | 108.1(3)   |
| O(7)-B(3)-O(9)    | 106.9(3)   |
| O(11)-B(4)-O(8)   | 124.4(4)   |
| O(11)-B(4)-O(10)  | 118.5(4)   |
| O(8)-B(4)-O(10)   | 117.1(4)   |
| O(16)-B(5)-O(5)   | 110.3(3)   |
| O(16)-B(5)-O(13)  | 112.5(3)   |
| O(5)-B(5)-O(13)   | 110.4(3)   |
| O(16)-B(5)-O(6)   | 108.7(3)   |
| O(5)-B(5)-O(6)    | 106.9(3)   |
| O(13)-B(5)-O(6)   | 107.9(3)   |
| O(12)-B(6)-O(18)  | 112.5(3)   |

---

---

|                     |           |
|---------------------|-----------|
| O(12)-B(6)-O(6)     | 113.1(3)  |
| O(18)-B(6)-O(6)     | 107.0(3)  |
| O(12)-B(6)-O(9)     | 110.2(3)  |
| O(18)-B(6)-O(9)     | 107.2(3)  |
| O(6)-B(6)-O(9)      | 106.4(3)  |
| O(19)-B(7)-O(11)    | 109.8(3)  |
| O(19)-B(7)-O(20)    | 113.1(3)  |
| O(11)-B(7)-O(20)    | 110.0(3)  |
| O(19)-B(7)-O(9)     | 108.5(3)  |
| O(11)-B(7)-O(9)     | 108.4(3)  |
| O(20)-B(7)-O(9)     | 106.9(3)  |
| O(16)-B(8)-O(17)    | 109.4(3)  |
| O(16)-B(8)-O(15)    | 112.9(3)  |
| O(17)-B(8)-O(15)    | 110.0(3)  |
| O(16)-B(8)-O(18)    | 108.7(3)  |
| O(17)-B(8)-O(18)    | 108.5(3)  |
| O(15)-B(8)-O(18)    | 107.1(3)  |
| O(19)-B(9)-O(22)    | 111.6(3)  |
| O(19)-B(9)-O(23)    | 111.9(3)  |
| O(22)-B(9)-O(23)    | 110.0(3)  |
| O(19)-B(9)-O(18)    | 107.8(3)  |
| O(22)-B(9)-O(18)    | 108.5(3)  |
| O(23)-B(9)-O(18)    | 106.9(3)  |
| O(17)-B(10)-O(24)   | 117.3(4)  |
| O(17)-B(10)-O(23)   | 123.0(4)  |
| O(24)-B(10)-O(23)   | 119.8(4)  |
| C(1B)-N(1A)-C(1A)   | 48.5(13)  |
| C(1B)-N(1A)-H(1AA)  | 102.8     |
| C(1A)-N(1A)-H(1AA)  | 109.5     |
| C(1B)-N(1A)-H(1AB)  | 146.3     |
| C(1A)-N(1A)-H(1AB)  | 109.5     |
| H(1AA)-N(1A)-H(1AB) | 109.5     |
| C(1B)-N(1A)-H(1AC)  | 67        |
| C(1A)-N(1A)-H(1AC)  | 109.5     |
| H(1AA)-N(1A)-H(1AC) | 109.5     |
| H(1AB)-N(1A)-H(1AC) | 109.5     |
| N(2B)-N(2A)-C(2A)   | 73.6(17)  |
| C(2B)-C(1A)-C(1B)   | 104(3)    |
| C(2B)-C(1A)-C(2A)   | 45(3)     |
| C(1B)-C(1A)-C(2A)   | 60.7(16)  |
| C(2B)-C(1A)-N(1A)   | 153(3)    |
| C(1B)-C(1A)-N(1A)   | 62.5(15)  |
| C(2A)-C(1A)-N(1A)   | 111.7(17) |
| C(2B)-C(1A)-N(2B)   | 50(2)     |

---

---

|                     |           |
|---------------------|-----------|
| C(1B)-C(1A)-N(2B)   | 107.7(14) |
| C(2A)-C(1A)-N(2B)   | 59.2(13)  |
| N(1A)-C(1A)-N(2B)   | 109.2(18) |
| C(2B)-C(1A)-N(1B)   | 149(3)    |
| C(1B)-C(1A)-N(1B)   | 53.9(11)  |
| C(2A)-C(1A)-N(1B)   | 105.4(19) |
| N(1A)-C(1A)-N(1B)   | 8.7(15)   |
| N(2B)-C(1A)-N(1B)   | 111.7(15) |
| C(2B)-C(1A)-H(1AD)  | 74.4      |
| C(1B)-C(1A)-H(1AD)  | 158.1     |
| C(2A)-C(1A)-H(1AD)  | 109.3     |
| N(1A)-C(1A)-H(1AD)  | 109.3     |
| N(2B)-C(1A)-H(1AD)  | 53.9      |
| N(1B)-C(1A)-H(1AD)  | 117.7     |
| C(2B)-C(1A)-H(1AE)  | 94.1      |
| C(1B)-C(1A)-H(1AE)  | 93.9      |
| C(2A)-C(1A)-H(1AE)  | 109.3     |
| N(1A)-C(1A)-H(1AE)  | 109.3     |
| N(2B)-C(1A)-H(1AE)  | 141.2     |
| N(1B)-C(1A)-H(1AE)  | 107.1     |
| H(1AD)-C(1A)-H(1AE) | 107.9     |
| C(2B)-C(2A)-C(1B)   | 76.2(13)  |
| C(2B)-C(2A)-C(1A)   | 26.9(12)  |
| C(1B)-C(2A)-C(1A)   | 50.6(13)  |
| C(2B)-C(2A)-N(2A)   | 106(3)    |
| C(1B)-C(2A)-N(2A)   | 122(2)    |
| C(1A)-C(2A)-N(2A)   | 111.0(17) |
| C(2B)-C(2A)-N(2B)   | 60.4(17)  |
| C(1B)-C(2A)-N(2B)   | 109.1(14) |
| C(1A)-C(2A)-N(2B)   | 70.5(15)  |
| N(2A)-C(2A)-N(2B)   | 46.0(16)  |
| C(2B)-C(2A)-H(2AA)  | 132.9     |
| C(1B)-C(2A)-H(2AA)  | 59.1      |
| C(1A)-C(2A)-H(2AA)  | 109.4     |
| N(2A)-C(2A)-H(2AA)  | 109.4     |
| N(2B)-C(2A)-H(2AA)  | 145.4     |
| C(2B)-C(2A)-H(2AB)  | 87.2      |
| C(1B)-C(2A)-H(2AB)  | 128.1     |
| C(1A)-C(2A)-H(2AB)  | 109.4     |
| N(2A)-C(2A)-H(2AB)  | 109.4     |
| N(2B)-C(2A)-H(2AB)  | 104       |
| H(2AA)-C(2A)-H(2AB) | 108       |
| C(1B)-N(1B)-C(1A)   | 40.5(9)   |
| C(1B)-N(1B)-H(1BA)  | 109.5     |

---

---

|                     |           |
|---------------------|-----------|
| C(1A)-N(1B)-H(1BA)  | 102.6     |
| C(1B)-N(1B)-H(1BB)  | 109.5     |
| C(1A)-N(1B)-H(1BB)  | 75        |
| H(1BA)-N(1B)-H(1BB) | 109.5     |
| C(1B)-N(1B)-H(1BC)  | 109.5     |
| C(1A)-N(1B)-H(1BC)  | 143.2     |
| H(1BA)-N(1B)-H(1BC) | 109.5     |
| H(1BB)-N(1B)-H(1BC) | 109.5     |
| N(2A)-N(2B)-C(2B)   | 101.3(18) |
| N(2A)-N(2B)-C(2A)   | 60.3(14)  |
| C(2B)-N(2B)-C(2A)   | 40.9(11)  |
| N(2A)-N(2B)-C(1A)   | 105.3(19) |
| C(2B)-N(2B)-C(1A)   | 21.6(8)   |
| C(2A)-N(2B)-C(1A)   | 50.2(9)   |
| C(1A)-C(1B)-C(2A)   | 68.7(14)  |
| C(1A)-C(1B)-N(1A)   | 69.0(12)  |
| C(2A)-C(1B)-N(1A)   | 122.7(17) |
| C(1A)-C(1B)-N(1B)   | 85.6(13)  |
| C(2A)-C(1B)-N(1B)   | 134.5(16) |
| N(1A)-C(1B)-N(1B)   | 16.6(14)  |
| C(1A)-C(1B)-C(2B)   | 26.1(9)   |
| C(2A)-C(1B)-C(2B)   | 43.8(14)  |
| N(1A)-C(1B)-C(2B)   | 92.9(11)  |
| N(1B)-C(1B)-C(2B)   | 109.4(10) |
| C(1A)-C(1B)-H(1BD)  | 130.2     |
| C(2A)-C(1B)-H(1BD)  | 67.3      |
| N(1A)-C(1B)-H(1BD)  | 119.1     |
| N(1B)-C(1B)-H(1BD)  | 109.8     |
| C(2B)-C(1B)-H(1BD)  | 109.8     |
| C(1A)-C(1B)-H(1BE)  | 110.1     |
| C(2A)-C(1B)-H(1BE)  | 114       |
| N(1A)-C(1B)-H(1BE)  | 115.8     |
| N(1B)-C(1B)-H(1BE)  | 109.8     |
| C(2B)-C(1B)-H(1BE)  | 109.8     |
| H(1BD)-C(1B)-H(1BE) | 108.2     |
| C(1A)-C(2B)-C(2A)   | 108(3)    |
| C(1A)-C(2B)-N(2B)   | 108(3)    |
| C(2A)-C(2B)-N(2B)   | 78.6(18)  |
| C(1A)-C(2B)-C(1B)   | 50(3)     |
| C(2A)-C(2B)-C(1B)   | 60.1(17)  |
| N(2B)-C(2B)-C(1B)   | 110.4(12) |
| C(1A)-C(2B)-H(2BA)  | 63.4      |
| C(2A)-C(2B)-H(2BA)  | 169.1     |
| N(2B)-C(2B)-H(2BA)  | 109.6     |

---

---

|                     |          |
|---------------------|----------|
| C(1B)-C(2B)-H(2BA)  | 109.6    |
| C(1A)-C(2B)-H(2BB)  | 141.7    |
| C(2A)-C(2B)-H(2BB)  | 74.6     |
| N(2B)-C(2B)-H(2BB)  | 109.6    |
| C(1B)-C(2B)-H(2BB)  | 109.6    |
| H(2BA)-C(2B)-H(2BB) | 108.1    |
| C(3B)-N(3A)-C(3A)   | 45.6(14) |
| C(3B)-N(3A)-H(3AA)  | 111.1    |
| C(3A)-N(3A)-H(3AA)  | 109.5    |
| C(3B)-N(3A)-H(3AB)  | 66.3     |
| C(3A)-N(3A)-H(3AB)  | 109.5    |
| H(3AA)-N(3A)-H(3AB) | 109.5    |
| C(3B)-N(3A)-H(3AC)  | 137.9    |
| C(3A)-N(3A)-H(3AC)  | 109.5    |
| H(3AA)-N(3A)-H(3AC) | 109.5    |
| H(3AB)-N(3A)-H(3AC) | 109.5    |
| C(4A)-N(4A)-C(4B)   | 7(2)     |
| C(3B)-C(3A)-C(4B)   | 95(3)    |
| C(3B)-C(3A)-N(3A)   | 57.4(17) |
| C(4B)-C(3A)-N(3A)   | 124(3)   |
| C(3B)-C(3A)-C(4A)   | 114(3)   |
| C(4B)-C(3A)-C(4A)   | 25.7(19) |
| N(3A)-C(3A)-C(4A)   | 118(2)   |
| C(3B)-C(3A)-N(3B)   | 55.3(16) |
| C(4B)-C(3A)-N(3B)   | 123(3)   |
| N(3A)-C(3A)-N(3B)   | 2.0(9)   |
| C(4A)-C(3A)-N(3B)   | 119(2)   |
| C(3B)-C(3A)-H(3AD)  | 137.8    |
| C(4B)-C(3A)-H(3AD)  | 122.1    |
| N(3A)-C(3A)-H(3AD)  | 107.7    |
| C(4A)-C(3A)-H(3AD)  | 107.7    |
| N(3B)-C(3A)-H(3AD)  | 109.1    |
| C(3B)-C(3A)-H(3AE)  | 54.1     |
| C(4B)-C(3A)-H(3AE)  | 82.7     |
| N(3A)-C(3A)-H(3AE)  | 107.7    |
| C(4A)-C(3A)-H(3AE)  | 107.7    |
| N(3B)-C(3A)-H(3AE)  | 105.8    |
| H(3AD)-C(3A)-H(3AE) | 107.1    |
| C(4B)-C(4A)-N(4A)   | 162(5)   |
| C(4B)-C(4A)-C(3A)   | 37(3)    |
| N(4A)-C(4A)-C(3A)   | 126(3)   |
| C(4B)-C(4A)-N(4B)   | 48(3)    |
| N(4A)-C(4A)-N(4B)   | 143(3)   |
| C(3A)-C(4A)-N(4B)   | 84.1(18) |

---

---

|                     |           |
|---------------------|-----------|
| C(4B)-C(4A)-H(4AA)  | 87.9      |
| N(4A)-C(4A)-H(4AA)  | 105.9     |
| C(3A)-C(4A)-H(4AA)  | 105.9     |
| N(4B)-C(4A)-H(4AA)  | 81.9      |
| C(4B)-C(4A)-H(4AB)  | 80.1      |
| N(4A)-C(4A)-H(4AB)  | 105.9     |
| C(3A)-C(4A)-H(4AB)  | 105.9     |
| N(4B)-C(4A)-H(4AB)  | 39.1      |
| H(4AA)-C(4A)-H(4AB) | 106.2     |
| C(3B)-N(3B)-C(3A)   | 36.0(12)  |
| C(3B)-N(3B)-H(3BA)  | 109.5     |
| C(3A)-N(3B)-H(3BA)  | 119.4     |
| C(3B)-N(3B)-H(3BB)  | 109.5     |
| C(3A)-N(3B)-H(3BB)  | 126.8     |
| H(3BA)-N(3B)-H(3BB) | 109.5     |
| C(3B)-N(3B)-H(3BC)  | 109.5     |
| C(3A)-N(3B)-H(3BC)  | 73.7      |
| H(3BA)-N(3B)-H(3BC) | 109.5     |
| H(3BB)-N(3B)-H(3BC) | 109.5     |
| C(4B)-N(4B)-C(4A)   | 23.9(10)  |
| C(3A)-C(3B)-N(3A)   | 77(2)     |
| C(3A)-C(3B)-N(3B)   | 89(2)     |
| N(3A)-C(3B)-N(3B)   | 11.6(10)  |
| C(3A)-C(3B)-C(4B)   | 44.1(18)  |
| N(3A)-C(3B)-C(4B)   | 104.5(14) |
| N(3B)-C(3B)-C(4B)   | 113.9(13) |
| C(3A)-C(3B)-H(3BD)  | 85        |
| N(3A)-C(3B)-H(3BD)  | 107.3     |
| N(3B)-C(3B)-H(3BD)  | 108.8     |
| C(4B)-C(3B)-H(3BD)  | 108.8     |
| C(3A)-C(3B)-H(3BE)  | 152.8     |
| N(3A)-C(3B)-H(3BE)  | 119.5     |
| N(3B)-C(3B)-H(3BE)  | 108.8     |
| C(4B)-C(3B)-H(3BE)  | 108.8     |
| H(3BD)-C(3B)-H(3BE) | 107.7     |
| C(4A)-C(4B)-C(3A)   | 117(4)    |
| C(4A)-C(4B)-N(4B)   | 108(3)    |
| C(3A)-C(4B)-N(4B)   | 131(2)    |
| C(4A)-C(4B)-C(3B)   | 142(4)    |
| C(3A)-C(4B)-C(3B)   | 41.2(17)  |
| N(4B)-C(4B)-C(3B)   | 107.3(14) |
| C(4A)-C(4B)-N(4A)   | 11(3)     |
| C(3A)-C(4B)-N(4A)   | 107(2)    |
| N(4B)-C(4B)-N(4A)   | 115.5(14) |

---

---

|                     |           |
|---------------------|-----------|
| C(3B)-C(4B)-N(4A)   | 136.8(15) |
| C(4A)-C(4B)-H(4BA)  | 69.6      |
| C(3A)-C(4B)-H(4BA)  | 70.1      |
| N(4B)-C(4B)-H(4BA)  | 110.3     |
| C(3B)-C(4B)-H(4BA)  | 110.3     |
| N(4A)-C(4B)-H(4BA)  | 60.7      |
| C(4A)-C(4B)-H(4BB)  | 43        |
| C(3A)-C(4B)-H(4BB)  | 115.8     |
| N(4B)-C(4B)-H(4BB)  | 110.3     |
| C(3B)-C(4B)-H(4BB)  | 110.3     |
| N(4A)-C(4B)-H(4BB)  | 49.3      |
| H(4BA)-C(4B)-H(4BB) | 108.5     |

---

Symmetry transformations used to generate equivalent atoms:

#1 -x,-y,-z+1
